# Supplementary material for: ERO1L Is a Novel and Potential Biomarker in Lung Adenocarcinoma and Shapes the Immune-Suppressive Tumor Microenvironment
Source: PubMed Central journal article supplement (PMC8329662; doi:10.3389/fimmu.2021.677169), 2021-07-20
Supplement: DataSheet_1.pdf [file DataSheet_1.pdf]

# ***ERO1L* is a novel and potential biomarker in lung adenocarcinoma and shapes the immune-suppressive tumor microenvironment**

Lihui Liu, Chao Wang, Sini Li, Pei Xue, Xue Zhang, Zixiao Ma,  
Yiting Sun, Yan Qu, Hua Bai and Jie Wang

## Supplementary Material

| <b>Table of Content</b> |                                                                                                                    |      |
|-------------------------|--------------------------------------------------------------------------------------------------------------------|------|
| Title                   | Content                                                                                                            | Page |
| Table S1                | Characteristics of included data sets from GEO database                                                            | 2    |
| Table S2                | Protein expressions of <i>ERO1L</i> in HPA database                                                                | 2    |
| Table S3                | Characteristics of included cohorts in PrognosScan database                                                        | 3    |
| Table S4                | Methylation sites mapped to the <i>ERO1L</i> gene                                                                  | 3    |
| Figure S1               | Expression and methylation profiles of <i>ERO1L</i> in LUAD                                                        | 4    |
| Figure S2               | Overexpression of <i>ERO1L</i> predicts a poorer prognosis and shapes an immune-suppressive tumor microenvironment | 5    |
| Figure S3               | Quantifying the different immune cell populations                                                                  | 6    |

**Table S1. Characteristics of included data sets from GEO database**

| Project  | Histology | Stage | Tumor sample | Normal sample | Experiment type        | Platforms |
|----------|-----------|-------|--------------|---------------|------------------------|-----------|
| GSE7670  | LUAD      | I-IV  | 27           | 27            | Affymetrix microarrays | GPL96     |
| GSE31210 | LUAD      | I-III | 226          | 20            | Affymetrix microarrays | GPL570    |
| GSE32863 | LUAD      | I-IV  | 58           | 58            | Affymetrix microarrays | PGL6884   |
| GSE19188 | LUAD      | I-IV  | 65           | 45            | Affymetrix microarrays | GPL570    |

**Table S2. Protein expressions of *ERO1L* in HPA database**

| Patient ID | Gender | Age | Histology | Antibody staining | Intensity | Quantity | Location                   | Antibody used           |
|------------|--------|-----|-----------|-------------------|-----------|----------|----------------------------|-------------------------|
| 1847       | Male   | 64  | LUAD      | Medium            | Moderate  | >75%     | Cytoplasmic/<br>membranous | CAB034294               |
| 1907       | Male   | 73  | LUAD      | Medium            | Moderate  | 75%-25%  | Cytoplasmic/<br>membranous | HPA026653/<br>HPA030053 |
| 1932       | Female | 57  | LUAD      | Medium            | Strong    | <25%     | Cytoplasmic/<br>membranous | HPA026653/<br>HPA030053 |
| 2003       | Female | 61  | LUAD      | High              | Strong    | 75%-25%  | Cytoplasmic/<br>membranous | HPA026653/<br>HPA030053 |
| 2041       | Female | 51  | LUAD      | Medium            | Moderate  | >75%     | Cytoplasmic/<br>membranous | CAB034294               |
| 2222       | Male   | 59  | LUAD      | Medium            | Moderate  | >75%     | Cytoplasmic/<br>membranous | CAB034294               |
| 2403       | Female | 65  | LUAD      | Medium            | Moderate  | >75%     | Cytoplasmic/<br>membranous | CAB034294               |
| 3003       | Male   | 49  | LUAD      | Low               | Weak      | >75%     | Cytoplasmic/<br>membranous | CAB034294               |
| 3391       | Female | 70  | LUAD      | Medium            | Moderate  | >75%     | Cytoplasmic/<br>membranous | CAB034294               |
| 4208       | Male   | 75  | LUAD      | Low               | Weak      | 75%-25%  | Cytoplasmic/<br>membranous | HPA026653/<br>HPA030053 |
| 4923       | Male   | 57  | LUAD      | High              | Strong    | 75%-25%  | Cytoplasmic/<br>membranous | HPA026653/<br>HPA030053 |

**Table S3. Characteristics of included cohorts in PrognScan database**

| Dataset           | Cancer type | Cohort | Endpoint | Patients | Probe ID     | HR   | 95% CIs   | <i>p</i> |
|-------------------|-------------|--------|----------|----------|--------------|------|-----------|----------|
| Jacob-00182-CANDF | LUAD        | CAN/DF | OS       | 82       | 218498_s_at  | 0.94 | 0.46-1.92 | 0.87     |
| Jacob-00182-HLM   | LUAD        | HLM    | OS       | 79       | 218498_s_at  | 2.31 | 1.25-4.26 | **       |
| Jacob-00182-MSK   | LUAD        | MSK    | OS       | 104      | 218498_s_at  | 1.73 | 0.82-3.66 | 0.15     |
| Jacob-00182-UM    | LUAD        | UM     | OS       | 178      | 218498_s_at  | 1.91 | 1.36-2.68 | ***      |
| GSE13213          | LUAD        | Nagoya | OS       | 117      | A_23_P106145 | 1.30 | 1.04-1.62 | *        |
| GSE13213          | LUAD        | Nagoya | OS       | 117      | A_24_P407311 | 1.37 | 1.06-1.78 | *        |
| GSE31210          | LUAD        | NCCRI  | OS       | 204      | 222646_s_at  | 2.42 | 1.48-3.98 | ***      |
| GSE31210          | LUAD        | NCCRI  | OS       | 204      | 218498_s_at  | 2.61 | 1.48-4.58 | ***      |
| GSE31210          | LUAD        | NCCRI  | PFS      | 204      | 222646_s_at  | 2.35 | 1.63-3.40 | ***      |
| GSE31210          | LUAD        | NCCRI  | PFS      | 204      | 218498_s_at  | 2.70 | 1.78-4.11 | ***      |

LUAD, lung adenocarcinoma; OS, overall survival; PFS, progression-free survival; HR, hazard ratio; 95% CI, 95% confidence interval. \*  $p < 0.05$ ; \*\*  $p < 0.01$ ; \*\*\*  $p < 0.001$

**Table S4. Methylation sites mapped to the *ERO1L* gene**

|            |            |            |            |            |
|------------|------------|------------|------------|------------|
| cg02221143 | cg04318602 | cg05380145 | cg05837075 | cg08081708 |
| cg08136587 | cg08554114 | cg10224939 | cg10872521 | cg13827458 |
| cg15393565 | cg18380353 | cg18561899 | cg21157519 | cg23580410 |
| cg26575110 | cg05837075 | cg08554114 |            |            |

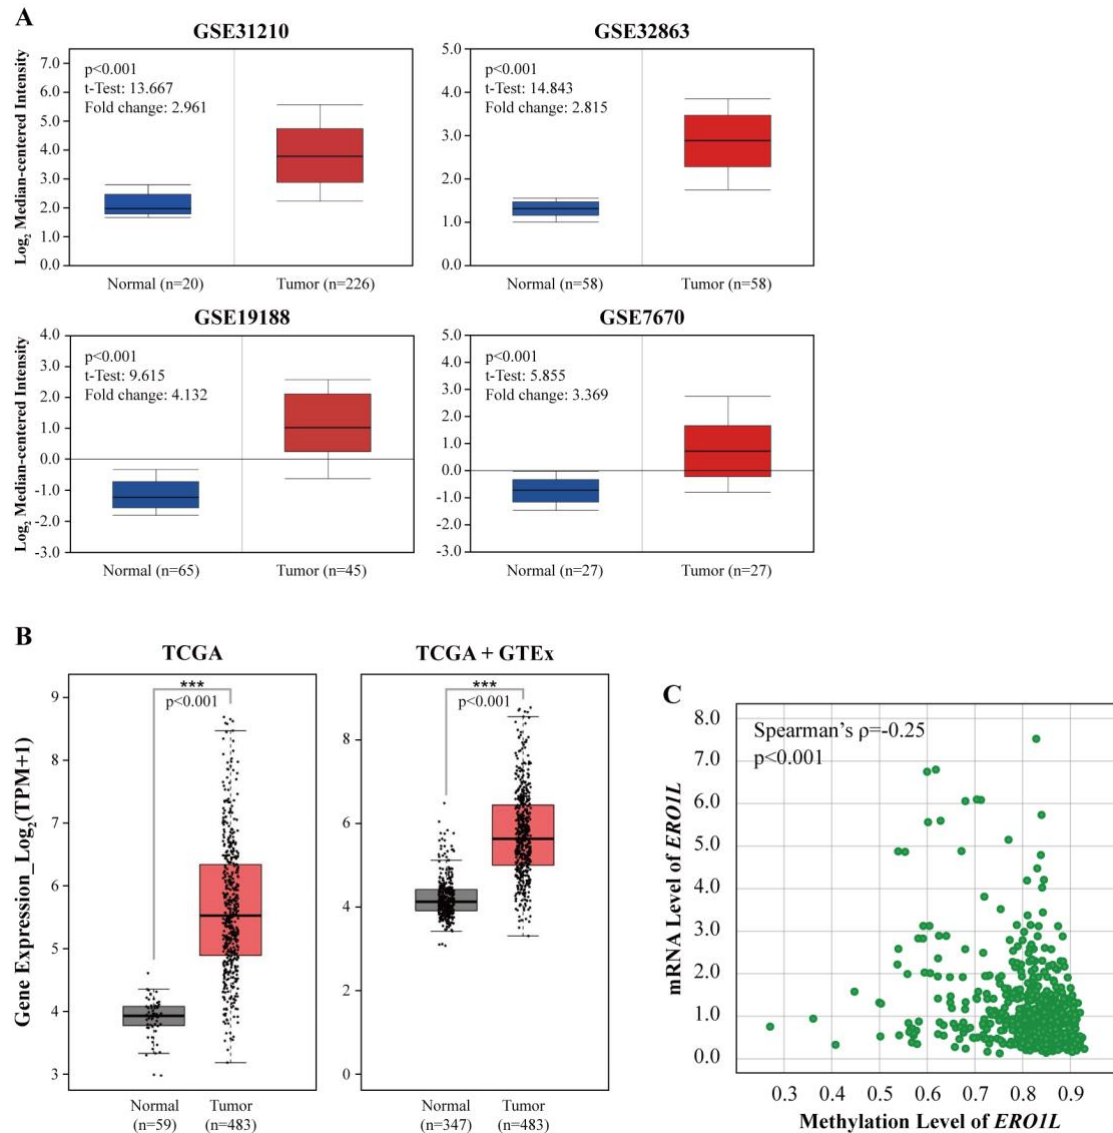

**Figure S1. Expression and methylation profiles of *ERO1L* in LUAD.** (A, B) Expression levels of *ERO1L* mRNA in LUAD, compared with normal tissues in the Oncomine database (A) and the TCGA database (B). (C) Correlation analysis between mRNA levels and methylation levels of *ERO1L*. GTEx, Genotype-Tissue Expression. \* $p < 0.05$ ; \*\* $p < 0.01$ ; \*\*\* $p < 0.001$ .

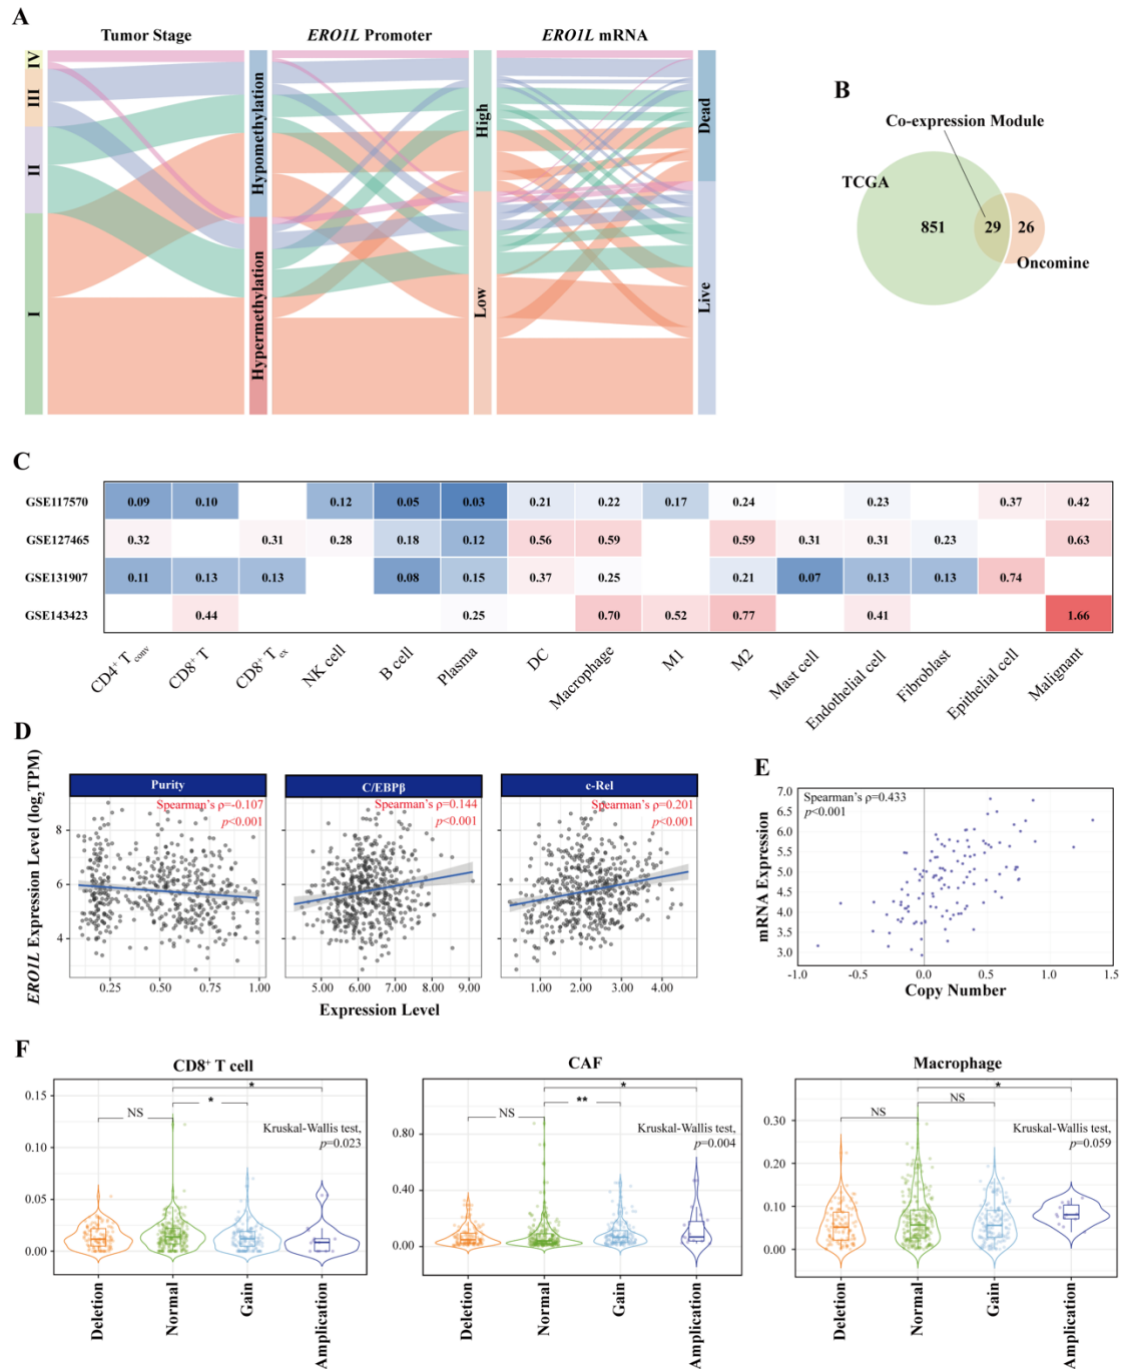

**Figure S2. Overexpression of *ERO1L* predicts a poorer prognosis and shapes an immune-suppressive tumor microenvironment.** (A) Path analysis described paths and patterns across tumor stages, promoter methylation levels, *ERO1L* mRNA expression, and survival status. (B) Venn plot for co-expression analysis of expression data from the TCGA program and Oncomine database. (C) Correlation analysis between *ERO1L* and infiltrating immune cells from four single-cell sequencing datasets. (D) Correlation analysis between *ERO1L* and *C/EBPβ* as well as *c-Rel*. (e,f) High expression level of *ERO1L* which were resulted from copy number variations (E) and relationships with infiltrating CD8<sup>+</sup> T cells, CAF, and macrophages (F). NK, natural killer; DC, dendritic cell; CAF, cancer-associated fibroblast. NS, no significance. \* $p < 0.05$ ; \*\* $p < 0.01$ ; \*\*\* $p < 0.001$ .

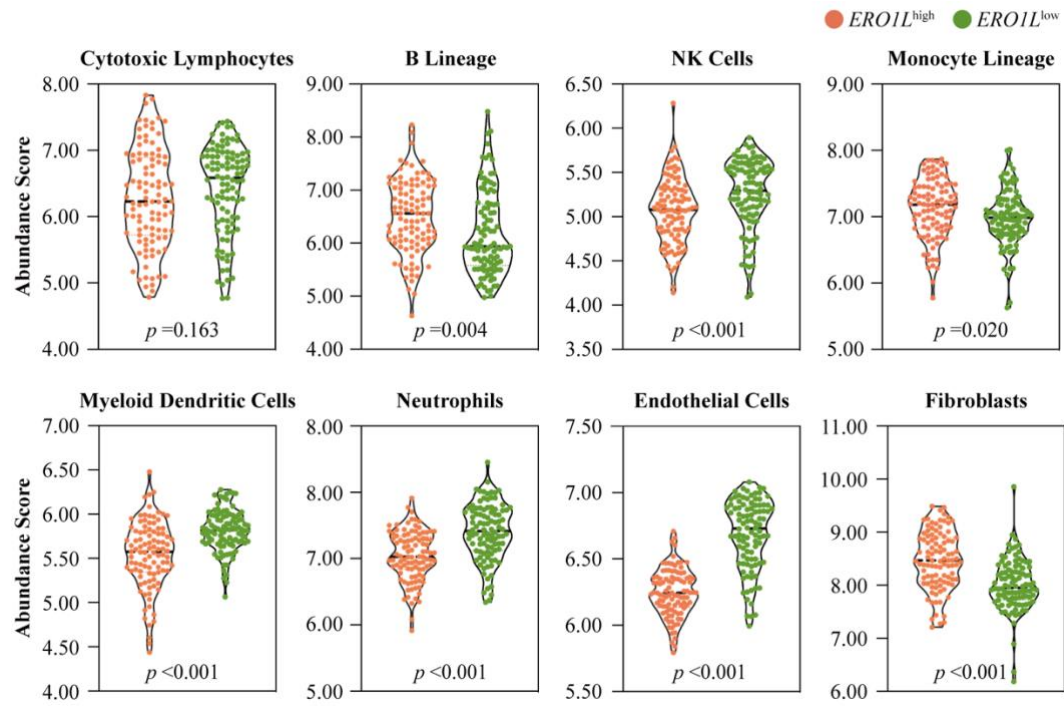

**Figure S3. Quantifying the different immune cell populations.** Immune cells within the  $EROIL^{high}$  and  $EROIL^{low}$  groups were calculated using the MCP counter framework. NK cells, natural killer cells.
